# Supplementary material
Source: PubMed Central journal article supplement (PMC7096263)
Supplement: NIHMS1556375-supplement-5.pdf [file NIHMS1556375-supplement-5.pdf]

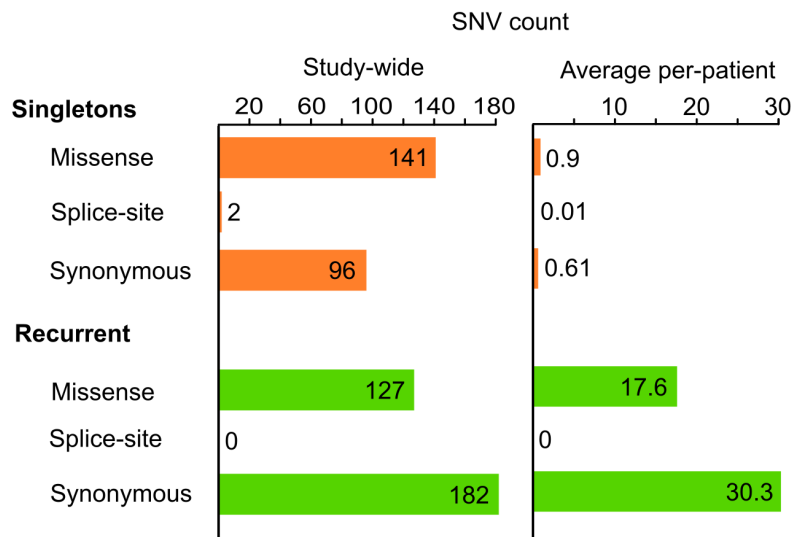

SI Figure 1. SNV found in the protein-coding regions of 49 canonical Charcot-Marie-Tooth genes following targeted genomic sequencing of 157 patients from trial N08CB.
