# Supplementary material
Source: PubMed Central journal article supplement (PMC7096263)
Supplement: NIHMS1556375-supplement-6.pdf [file NIHMS1556375-supplement-6.pdf]

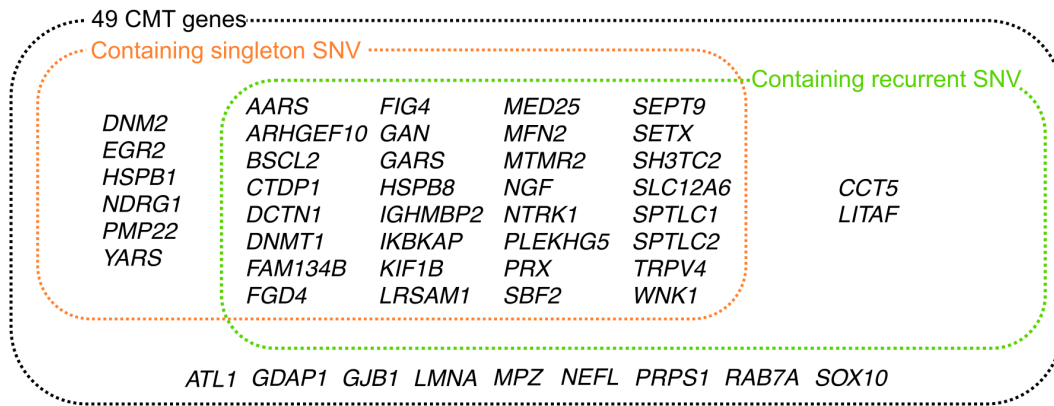

SI Figure 2. Charcot-Marie-Tooth genes categorized by the presence of singleton and recurrent non-synonymous SNV.
